# Supplementary material for: Lifelong development in medicine: a thematic analysis of coaching goals throughout medical careers
Source: HighWire-hosted journal article supplement (doi:10.1136/bmjopen-2023-081139), 2024-05-01
Supplement: bmjopen-2023-081139supp002_data_supplement.pdf [file bmjopen-2023-081139supp002_data_supplement.pdf]

SUPPLEMENTAL MATERIAL B

The Supplemental Figure B1 is a visual breakdown of theme prevalence across different career stages. Each vertical line represents a specific career stage, with the area between two lines illustrating how the prevalence of a particular theme shifts between adjacent career stages. For example, the figure demonstrates that as physicians progress in their careers, the theme of *interpersonal relations at work* (depicted in gray) becomes more prevalent.

Supplemental Table B1

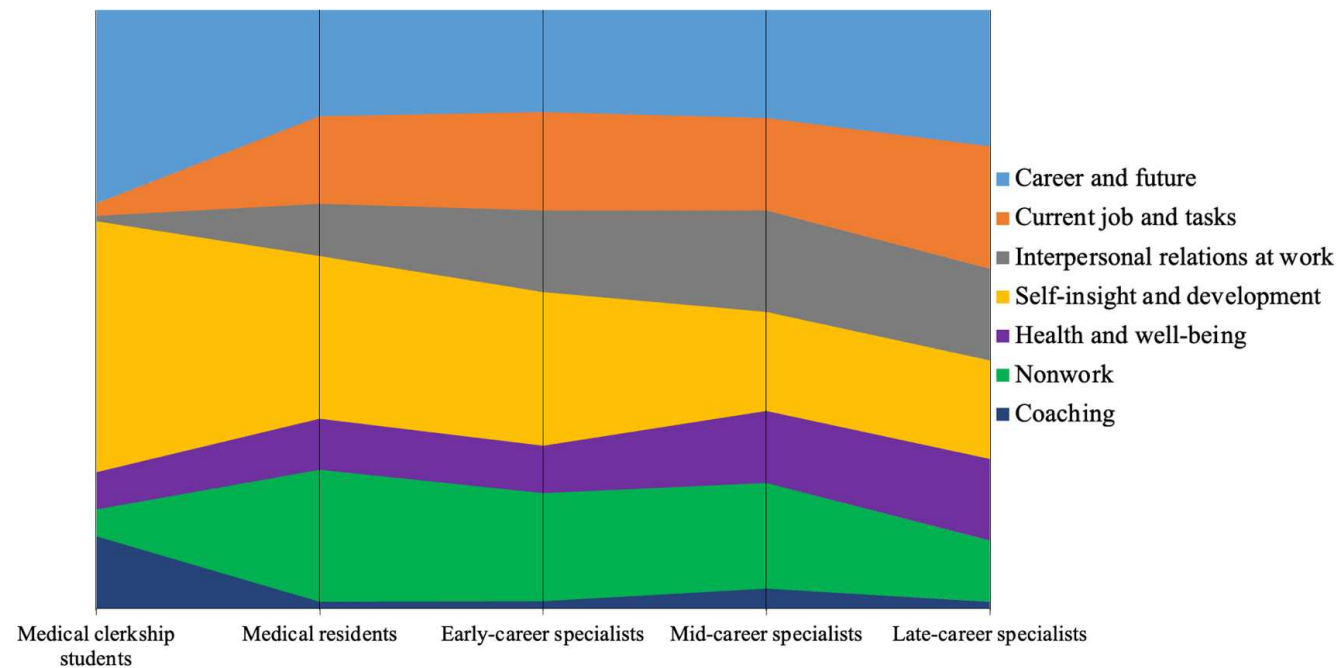

The Supplemental Table B1 shows the prevalence of themes, sub-themes, and categories within each career stage.

| Supplemental Table B1 Themes, sub-themes, categories, and percentages within each career stage |                                           |                                    |                        |      |      |      |      |
|------------------------------------------------------------------------------------------------|-------------------------------------------|------------------------------------|------------------------|------|------|------|------|
| Theme                                                                                          | Sub-theme                                 | Categories                         | % within career stages |      |      |      |      |
|                                                                                                |                                           |                                    | S                      | R    | ES   | MS   | LS   |
| Career and future                                                                              | Make career choice and set career goals   | make career choice                 | 14.8                   | 3.8  | 2.1  | 1.1  | 2.8  |
|                                                                                                |                                           | plan career                        | 3.3                    | 5.3  | 5.4  | 6.0  | 7.4  |
|                                                                                                | Facilitate career transitions             | explore and prepare for job market | 5.3                    | 1.0  | 0.8  | 0.4  | 0.0  |
|                                                                                                |                                           | prepare for retirement             | 0.0                    | 0.0  | 0.0  | 0.8  | 6.8  |
|                                                                                                | Create general future goals and plans     | set general goals and plans        | 7.6                    | 6.3  | 8.5  | 7.9  | 4.5  |
|                                                                                                |                                           | attain general goals               | 1.2                    | 1.2  | 0.3  | 1.9  | 1.1  |
|                                                                                                | Theme total %                             |                                    | 32.2                   | 17.7 | 17.0 | 18.0 | 22.7 |
| Coaching                                                                                       | Get support from the coach                | get new perspective                | 5.9                    | 0.1  | 0.3  | 0.8  | 1.1  |
|                                                                                                |                                           | get advice and guidance            | 4.8                    | 1.0  | 0.3  | 0.8  | 0.0  |
|                                                                                                | Discover coaching                         | get to know the coaching program   | 1.4                    | 0.1  | 0.8  | 1.9  | 0.0  |
|                                                                                                | Theme total %                             |                                    | 12.1                   | 1.2  | 1.3  | 3.4  | 1.1  |
| Current job and tasks                                                                          | Deal with my job position and demands     | analyze my current position        | 0.6                    | 1.6  | 1.5  | 1.1  | 1.1  |
|                                                                                                |                                           | deal with job demands              | 0.3                    | 2.1  | 1.5  | 1.5  | 0.6  |
|                                                                                                | Improve task management and performance   | improve and keep job autonomy      | 0.0                    | 0.6  | 0.3  | 0.4  | 0.0  |
|                                                                                                |                                           | organize my work                   | 0.5                    | 3.4  | 4.4  | 3.4  | 8.0  |
|                                                                                                |                                           | optimize performance               | 0.2                    | 3.0  | 3.3  | 3.4  | 1.1  |
|                                                                                                | Enhance job attitudes                     | improve and keep job motivation    | 0.0                    | 1.0  | 0.5  | 1.1  | 4.5  |
|                                                                                                |                                           | find and keep job satisfaction     | 0.6                    | 3.1  | 4.6  | 4.5  | 4.5  |
|                                                                                                |                                           | find meaning in work               | 0.0                    | 0.0  | 0.3  | 0.0  | 0.6  |
|                                                                                                | Theme total %                             |                                    | 2.1                    | 14.6 | 16.5 | 15.4 | 20.5 |
| Interpersonal work relations                                                                   | Better influence others                   | improve leadership skills          | 0.0                    | 1.5  | 3.1  | 5.3  | 4.5  |
|                                                                                                |                                           | improve feedback skills            | 0.0                    | 1.9  | 2.6  | 1.9  | 2.8  |
|                                                                                                | Improve teamwork                          | profiling in a team                | 0.5                    | 2.5  | 2.3  | 2.6  | 2.3  |
|                                                                                                |                                           | better communication               | 0.0                    | 0.7  | 0.5  | 1.1  | 0.0  |
|                                                                                                |                                           | connect with team                  | 0.2                    | 0.7  | 1.3  | 2.6  | 1.7  |
|                                                                                                | Cope better with interpersonal challenges | deal with organizational climate   | 0.3                    | 0.3  | 0.5  | 1.1  | 2.3  |
|                                                                                                |                                           | deal with others                   | 0.0                    | 1.2  | 3.3  | 2.3  | 1.7  |
|                                                                                                | Theme total %                             |                                    | 0.9                    | 8.7  | 13.6 | 16.9 | 15.3 |
| Health and well-being                                                                          | Cultivate health-promoting qualities      | build resilient qualities          | 0.2                    | 0.2  | 0.0  | 0.4  | 0.0  |
|                                                                                                |                                           | curb perfectionism                 | 0.5                    | 1.4  | 1.0  | 1.1  | 0.6  |
|                                                                                                |                                           | improve personal adaptability      | 0.8                    | 0.7  | 0.3  | 1.9  | 1.7  |

|                              |                                  |                               |      |               |      |      |      |
|------------------------------|----------------------------------|-------------------------------|------|---------------|------|------|------|
| Vitality and mood            |                                  | health and vitality           | 2.4  | 3.4           | 3.3  | 4.1  | 6.3  |
|                              |                                  | better mood                   | 0.8  | 1.7           | 1.5  | 1.5  | 2.8  |
|                              |                                  | cope with negative emotions   | 0.3  | 0.5           | 0.8  | 1.1  | 1.7  |
|                              |                                  | deal with negative events     | 1.4  | 0.7           | 1.0  | 1.9  | 0.6  |
|                              |                                  | Theme total %                 | 6.2  | 8.5           | 8.0  | 12.0 | 13.6 |
| Self-insight and development | Discover myself                  | get to know myself            | 4.4  | 3.9           | 5.9  | 3.8  | 4.0  |
|                              |                                  | discover my talents and flaws | 2.6  | 3.5           | 3.1  | 1.1  | 1.1  |
|                              |                                  | uncover professional identity | 17.1 | 2.2           | 0.8  | 1.1  | 0.0  |
|                              |                                  | understand my priorities      | 2.9  | 3.1           | 3.3  | 1.9  | 3.4  |
|                              | Develop myself                   | improve confidence            | 6.7  | 8.1           | 5.1  | 1.5  | 1.7  |
|                              |                                  | utilize qualities and flaws   | 2.1  | 3.8           | 3.1  | 3.8  | 4.0  |
|                              |                                  | enhance self-development      | 6.2  | 2.6           | 4.4  | 3.4  | 2.3  |
|                              |                                  |                               |      | Theme total % | 41.9 | 27.2 | 25.7 |
| Nonwork                      | Foster balance and boundaries    | create work-nonwork balance   | 3.9  | 17.8          | 14.1 | 12.8 | 6.3  |
|                              |                                  | find and maintain balance     | 0.0  | 0.2           | 1.5  | 1.1  | 1.7  |
|                              |                                  | set boundaries                | 0.3  | 2.3           | 1.3  | 1.9  | 0.0  |
|                              | Attention for nonwork activities | care for family and leisure   | 0.2  | 0.6           | 1.0  | 0.8  | 0.6  |
|                              |                                  | detach from work              | 0.2  | 1.1           | 0.0  | 1.1  | 1.7  |
|                              |                                  |                               |      | Theme total % | 4.5  | 22.0 | 18.0 |

S = medical clerkship students. R = medical residents. ES = early-career specialists. MS= mid-career specialists. LS = late-career specialists. The percentages are calculated within each career stage. Hence. each percentage shows how often a certain category of coaching goals was mentioned by physicians within that career stage.
